# Supplementary material for: Microphase separation assisted reduction in the percolation threshold of MWCNT/block polymer composites
Source: Royal Society of Chemistry journal article supplement (doi:10.1039/d2sm01277d), 2023-01-01
Supplement: d2sm01277d1.pdf [file d2sm01277d1.pdf]

## Supporting Information

# Microphase separation assisted reduction in the percolation threshold of MWCNT/block polymer composites

Gokhan Topcu,<sup>†\*</sup> David Reinoso Arenas,<sup>‡</sup> Tony McNally,<sup>‡</sup> and C. Remzi Becer<sup>†</sup>

<sup>†</sup> *Department of Chemistry, University of Warwick, Coventry, CV4 7AL, UK*

<sup>‡</sup> *International Institute for Nanocomposites Manufacturing (IINM), WMG, University of Warwick, Coventry CV4 7AL, UK*

\*E-mail: Gokhan.Topcu@warwick.ac.uk

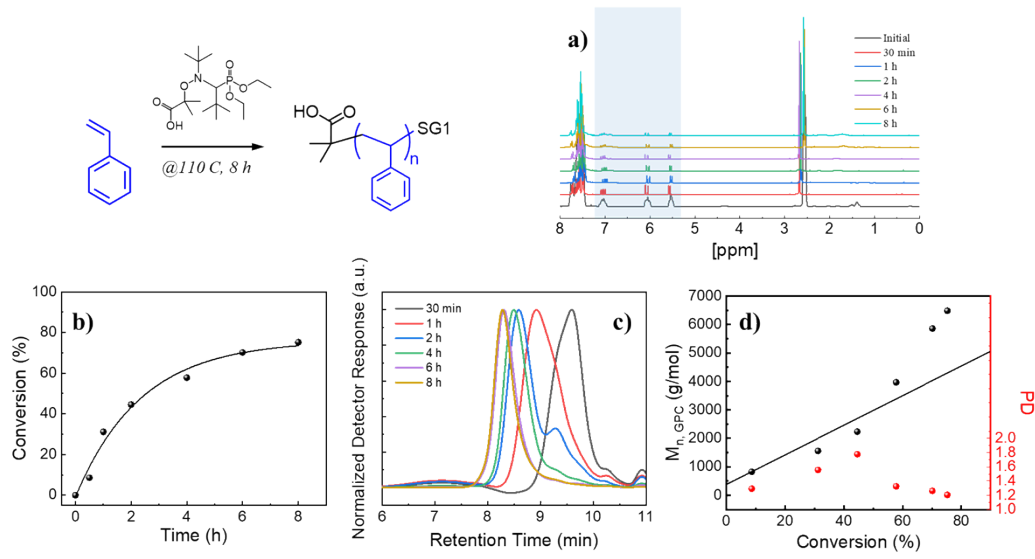

**Fig. S1.** (a)  $^1\text{H}$  NMR spectra, (b) conversion, (c) GPC traces of styrene macroinitiator in time for NMP. (d)  $M_n$  vs. conversion plot; black symbols represent  $M_{n,\text{GPC}}$ , red symbols their polydispersity, and the solid line represents the respective  $M_{n,\text{theo}}$ .

$$f_{St} = \frac{\frac{N_{St} \times m_{St}}{\rho_{St}}}{\left(\frac{N_{St} \times m_{St}}{\rho_{St}}\right) + \left(\frac{N_{EHA} \times m_{EHA}}{\rho_{EHA}}\right)} \quad (1)$$

The volume fraction of blocks was calculated above formulation.  $N_{St}$  and  $N_{EHA}$  are the degrees of polymerisation of the styrene and EHA blocks.  $m_{St}$  and  $m_{EHA}$  are the molar masses of styrene (104 g/mol) and EHA (184 g/mol).  $\rho_{St}$  and  $\rho_{EHA}$  are the densities of blocks which are taken as 0.909 and 0.885 g/mL, respectively.

**Table 1.** Calculated constants for phase boundaries by using SFCT

| Phase Boundary | $C_1$  | $C_2$  | $C_3$  | $C_4$ | $C_5$ | $C_6$ | $C_7$ | $C_8$ | $C_9$ | $C_{10}$ |
|----------------|--------|--------|--------|-------|-------|-------|-------|-------|-------|----------|
| D/BCP          | 7.891  | 0.707  | 0.984  | 3.793 | 0.996 | 0.922 | 0.896 | 0.882 | 0.874 | 0.870    |
| BCP/S          | 8.494  | 0.765  | 2.960  | 3.821 | 1.046 | 0.972 | 0.949 | 0.938 | 0.931 | 0.927    |
| S/H            | 7.463  | 6.043  | 1.681  | 1.372 | 1.308 | 1.299 | 1.318 | 1.381 | 3.336 | 1.426    |
| H/G            | 14.693 | 0.306  | 0.551  | 1.211 | 1.706 | 7.256 | 1.415 | 1.190 | 1.089 | 1.031    |
| G/L            | 18.508 | 10.763 | -0.113 | 0.646 | 1.309 | 1.340 | 1.435 | 7.236 | 1.332 | 1.157    |

$C_0 = 10.5$  for all boundaries
